# Supplementary material
Source: publisher figshare collection journal article supplement (https://acs.figshare.com/ndownloader/files/4176457)

Supporting Information

**Synthesis and Properties of 5-Cyano Substituted Nucleoside Analog with a Donor-Donor-Acceptor Hydrogen Bonding Pattern**

Hyo-Joong Kim<sup>1,2</sup>, Fei Chen<sup>1,2,3</sup>, and Steven A. Benner<sup>1,2\*</sup>

<sup>1</sup>Foundation for Applied Molecular Evolution (FfAME), 720 SW 2nd Avenue, Suite 201, Gainesville, FL 32601

<sup>2</sup>The Westheimer Institute for Science and Technology (TWIST), 720 SW 2nd Avenue, Suite 208, Gainesville, FL 32601

<sup>3</sup>The CAS Key Laboratory of Genome Sciences and Information, Beijing Institute of Genomics, Chinese Academy of Sciences, Beijing, China

- Corresponding author; [sbenner@ffame.org](mailto:sbenner@ffame.org)

## Table of contents

|                                                                                                   |    |
|---------------------------------------------------------------------------------------------------|----|
| <b>Figure S1.</b> pK <sub>a</sub> of compound <b>4</b> .....                                      | 3  |
| <b>Figure S2.</b> Epimerization of compound <b>4</b> at pH 2.1 and room temperature.....          | 4  |
| <b>Figure S3.</b> Epimerization of compound <b>4</b> at pH 7.0 and room temperature or 55 °C..... | 5  |
| <b>Figure S4.</b> Standing-start primer extension of <b>16</b> .....                              | 6  |
| <sup>1</sup> H and <sup>13</sup> C NMR spectra of compound <b>10</b> .....                        | 7  |
| <sup>1</sup> H and <sup>13</sup> C NMR spectra of compound <b>11</b> .....                        | 8  |
| <sup>1</sup> H NMR spectrum of compound <b>12</b> .....                                           | 9  |
| <sup>1</sup> H and <sup>13</sup> C NMR spectra of compound <b>13</b> .....                        | 10 |
| <sup>1</sup> H and <sup>13</sup> C NMR spectra of compound <b>14</b> .....                        | 11 |
| <sup>1</sup> H and <sup>13</sup> C NMR spectra of compound <b>4</b> .....                         | 12 |
| <sup>1</sup> H and <sup>13</sup> C NMR spectra of compound <b>15</b> .....                        | 13 |
| <sup>1</sup> H and <sup>31</sup> P NMR spectra of compound <b>16</b> .....                        | 14 |

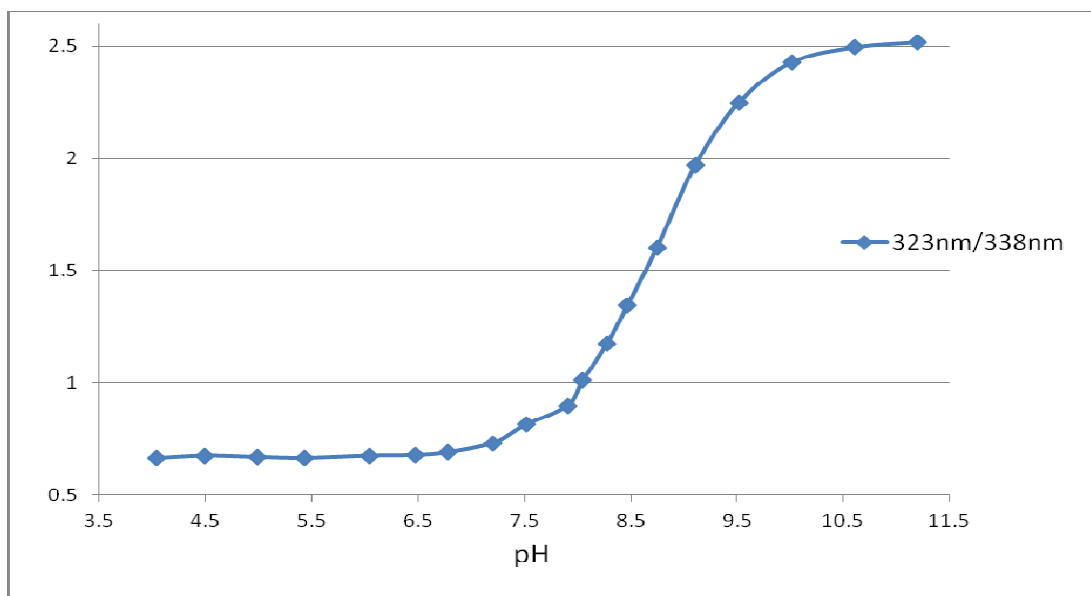

**Figure S1.** The ratio of absorbance at 323 nm and 338 nm measured as a function of pH give an estimate of the  $pK_a$  of 2'-deoxyribonucleoside **4** (cyano-d $\mathbf{Z}$ ) to be 8.8.

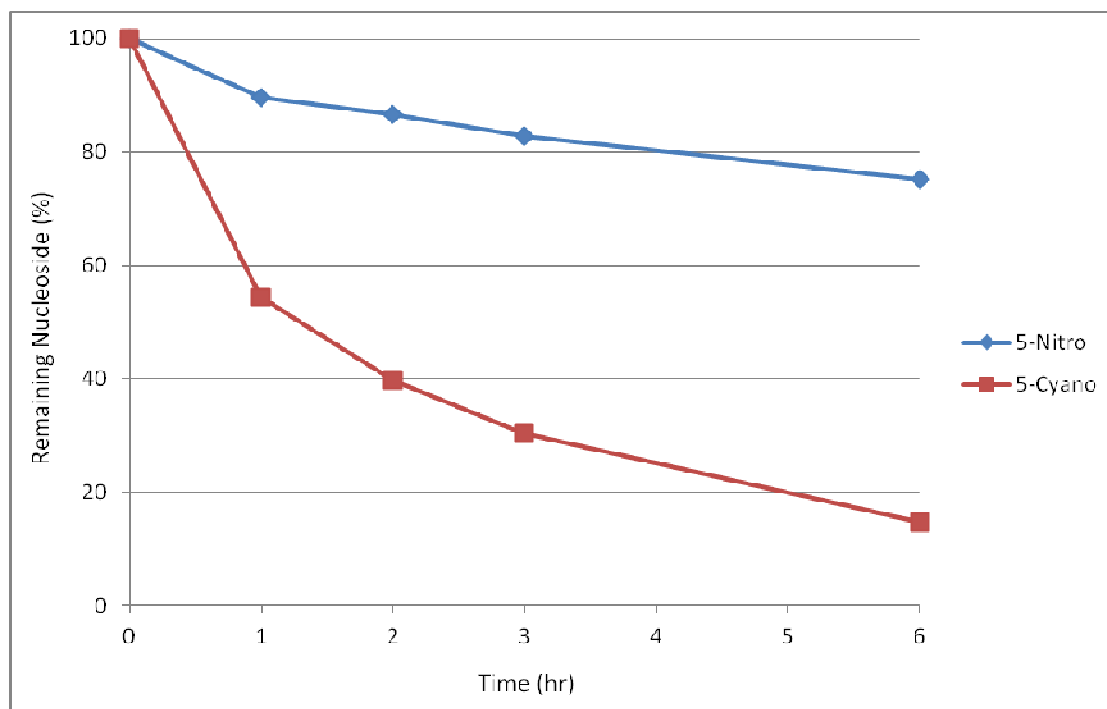

**Figure S2.** Epimerization of 5-nitro and 5-cyano (**4**) substituted pyDDA nucleosides at pH 2.1 and room temperature.

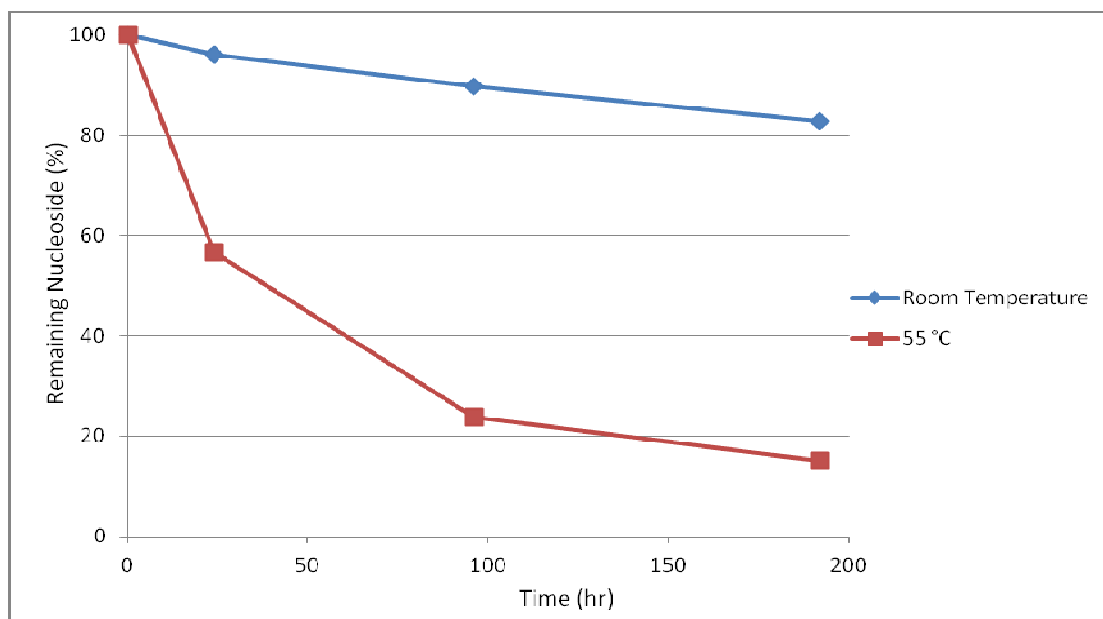

**Figure S3.** Time courses of epimerization of 5-cyano substituted py-DDA nucleoside (**4**) at pH 7.0 and room temperature or 55 °C.

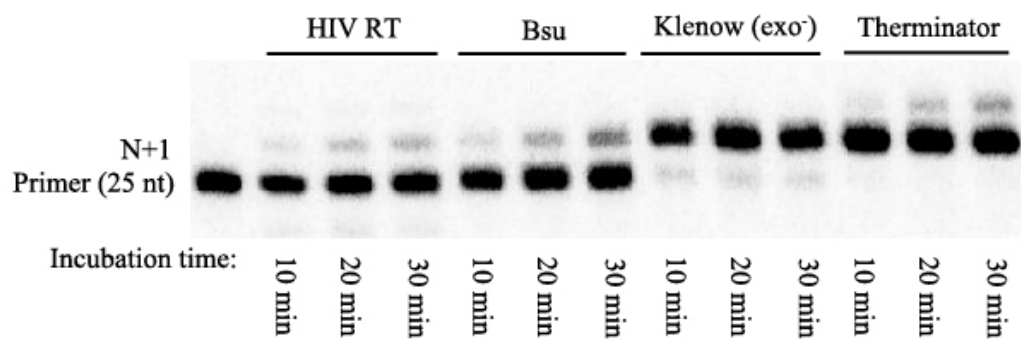

**Figure S4.** Standing-start primer extension showing the time course of polymerases as they incorporate cyano-dZTP (**16**) opposite template dP.

STANDARD 1H OBSERVE

Pulse Sequence: s2pu1

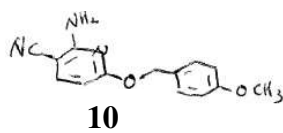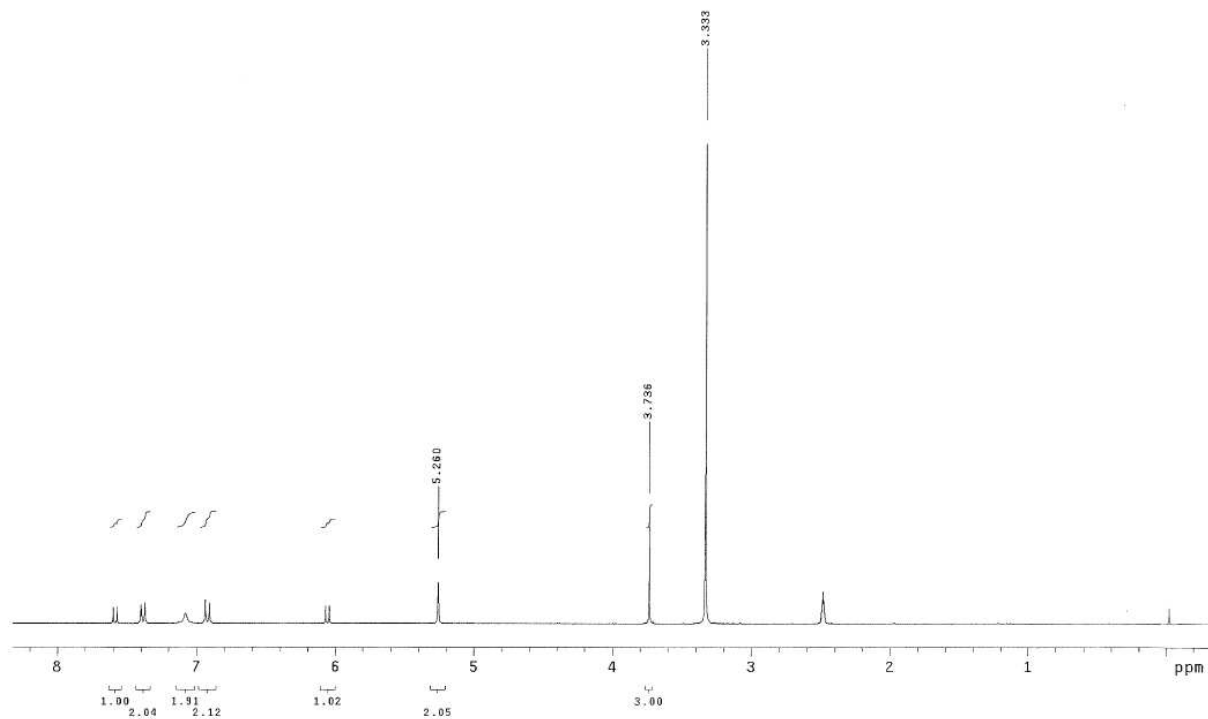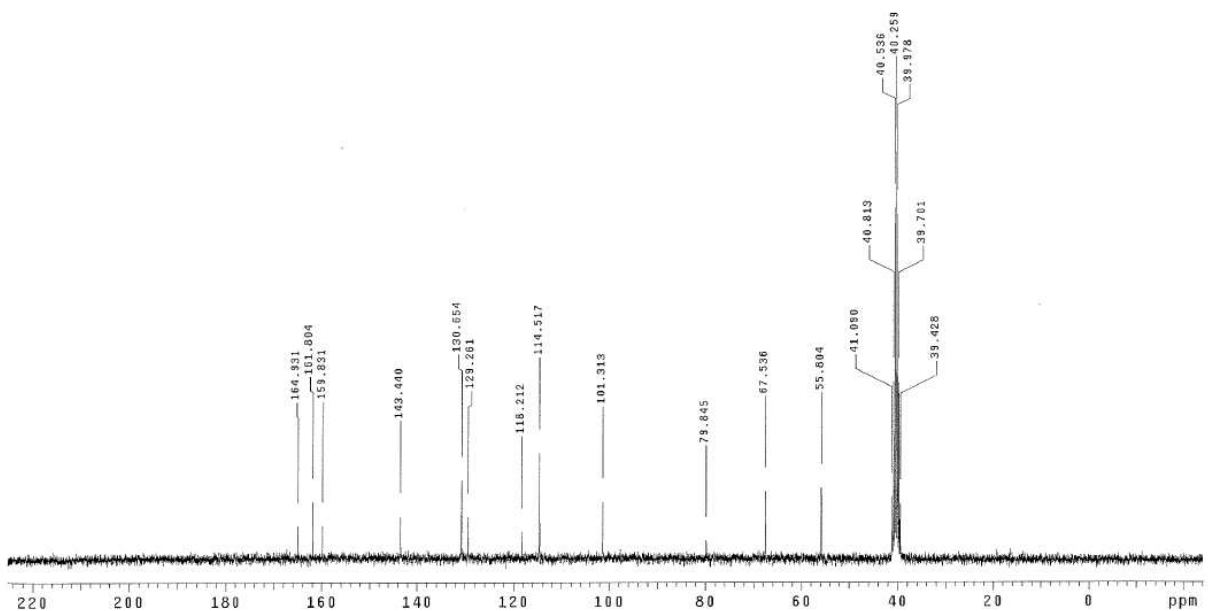

STANDARD 1H OBSERVE  
Pulse Sequence: s2pul

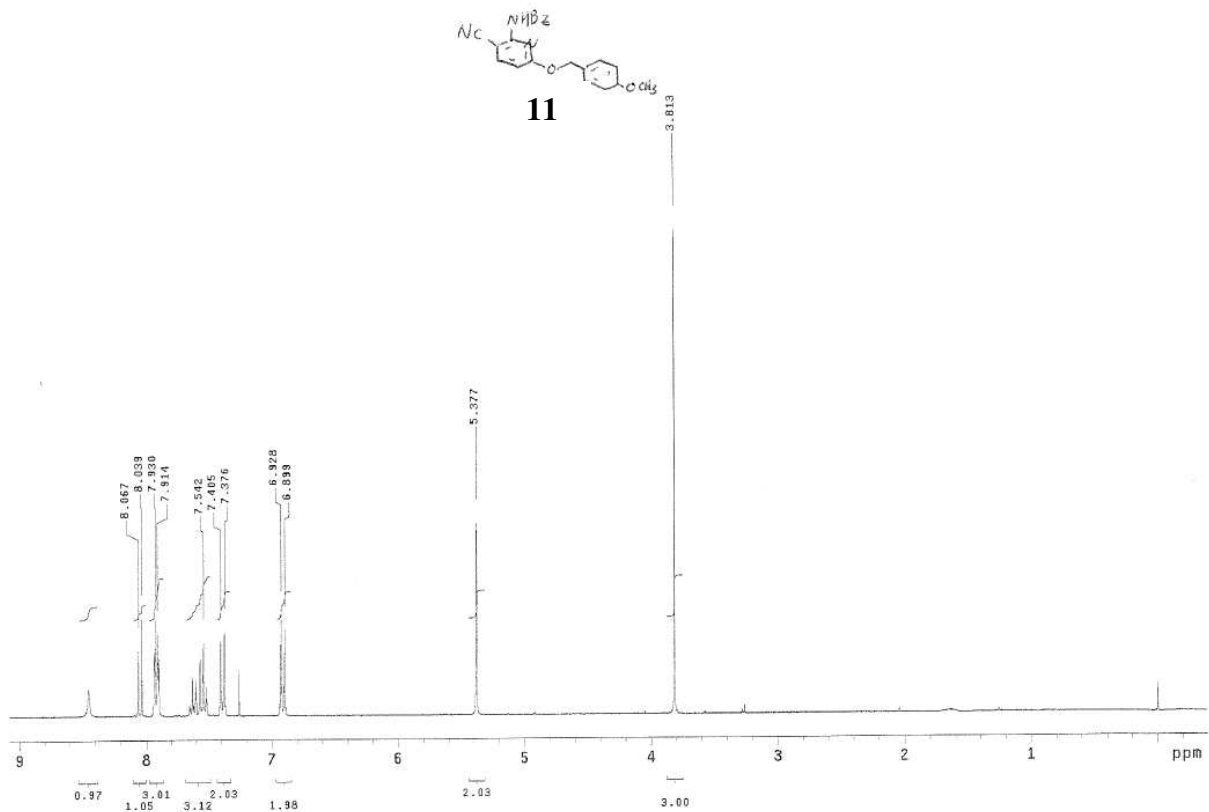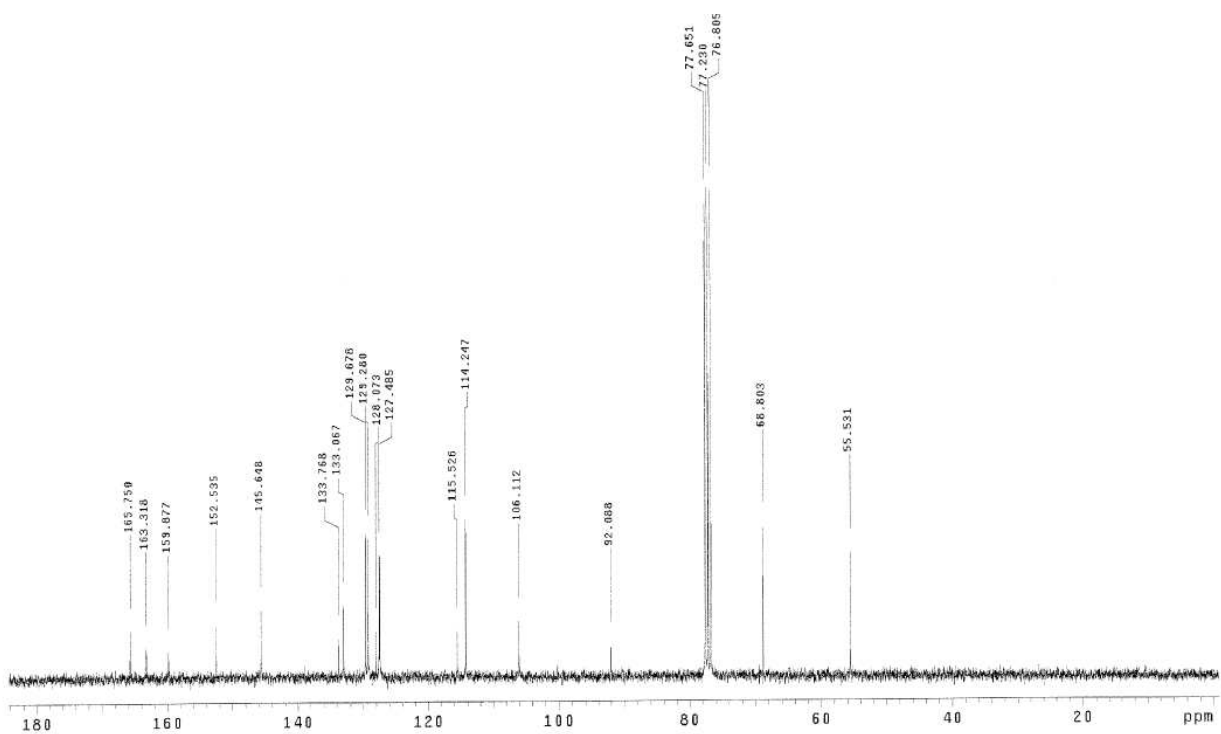



STANDARD 1H OBSERVE  
Pulse Sequence: s2pu1

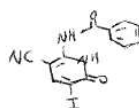

12

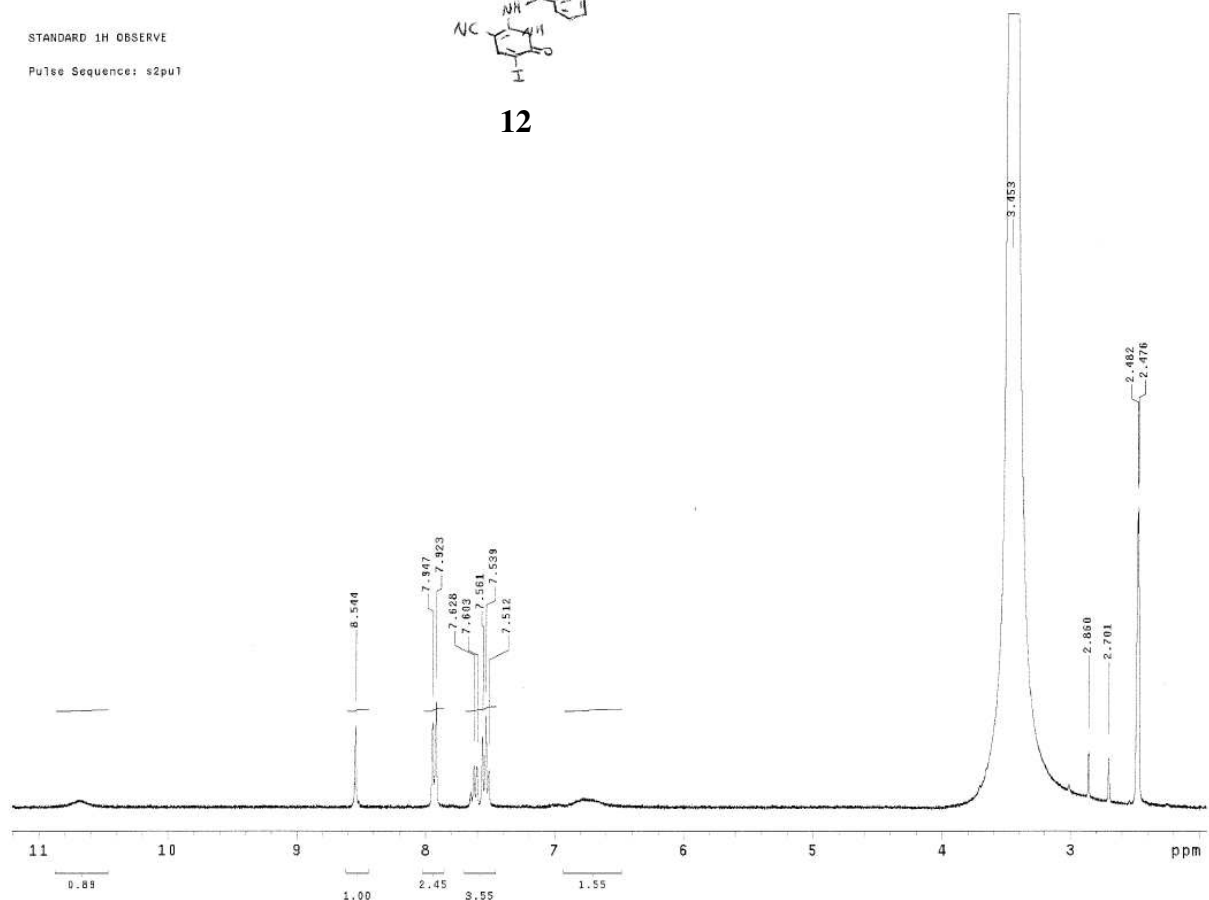

STANDARD 1H OBSERVE  
Pulse Sequence: s2pul

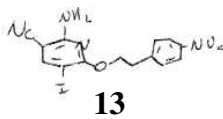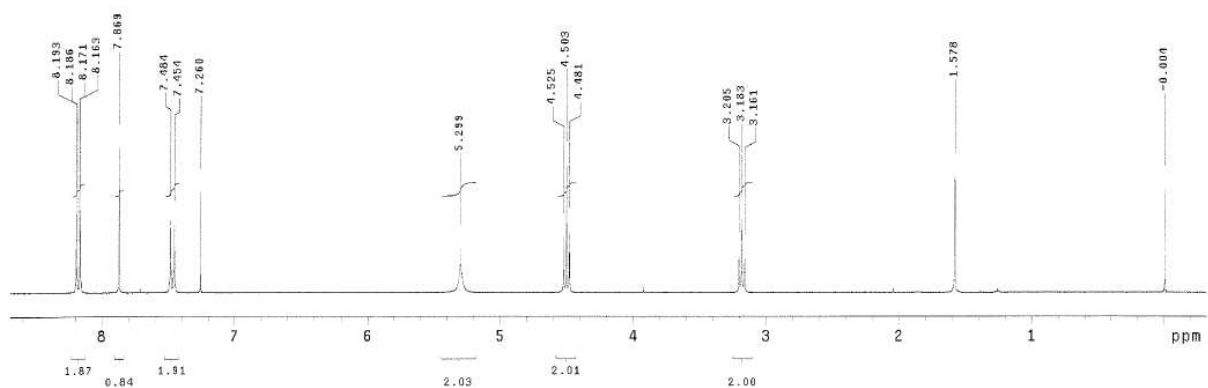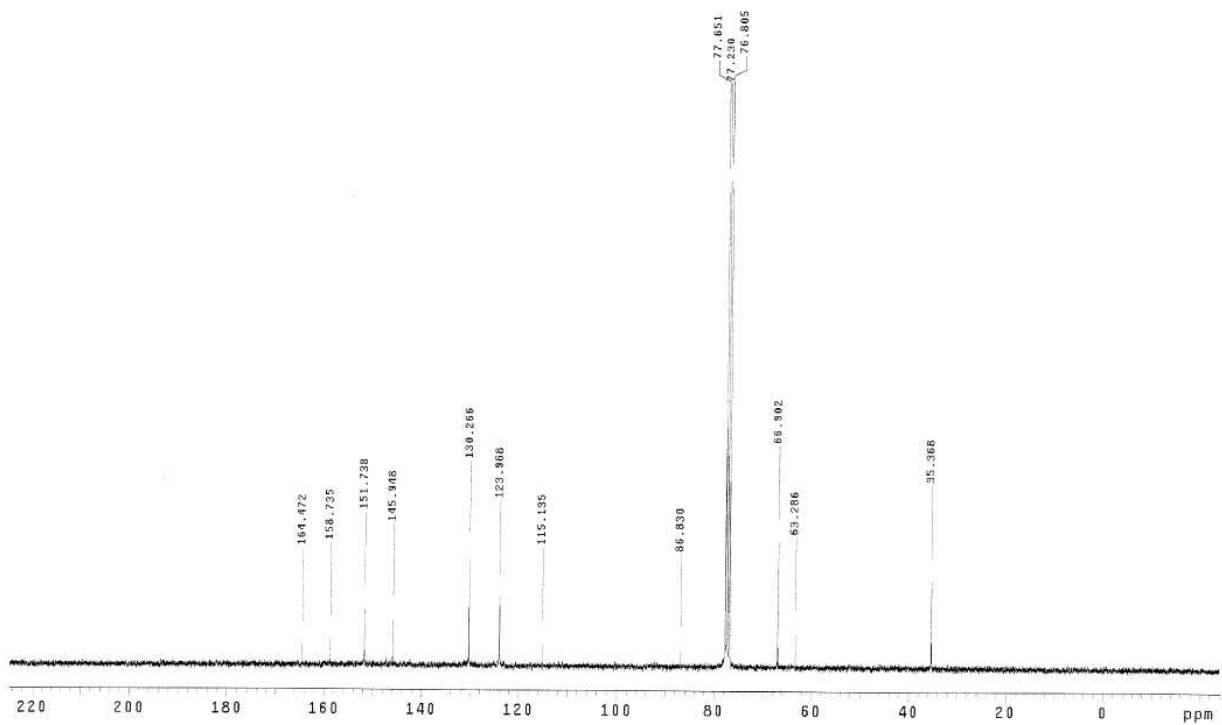

STANDARD 1H OBSERVE  
Pulse Sequence: s2pu1

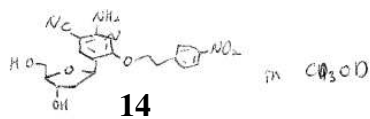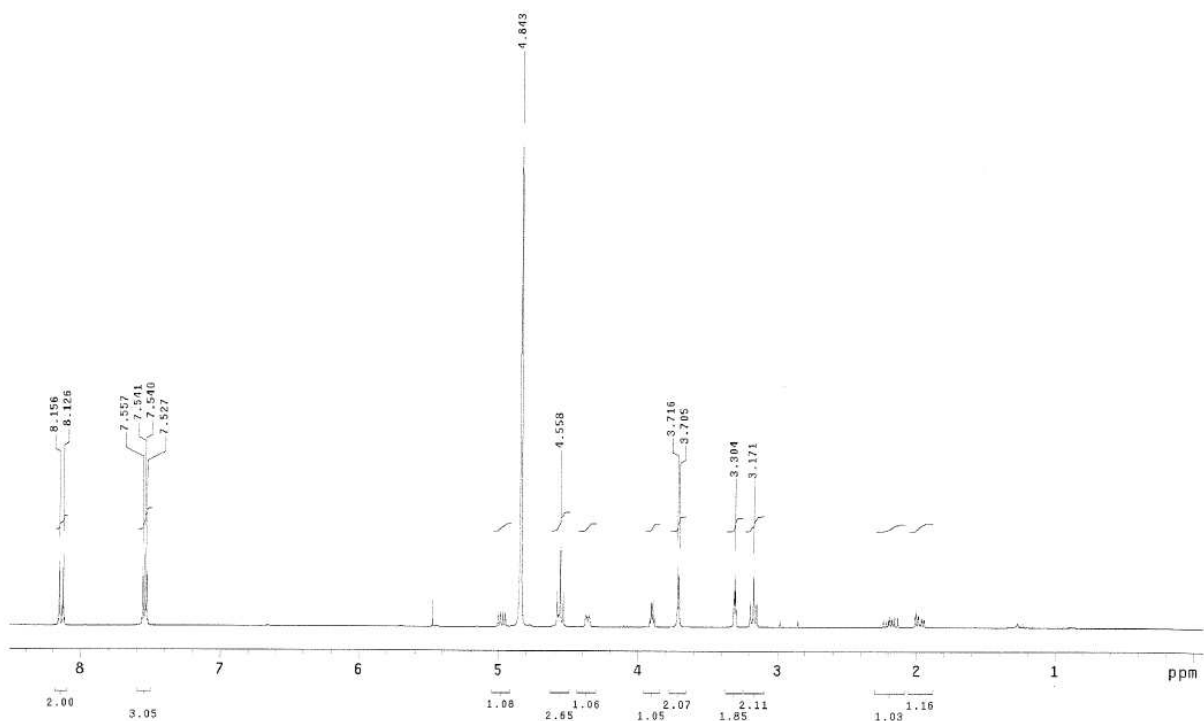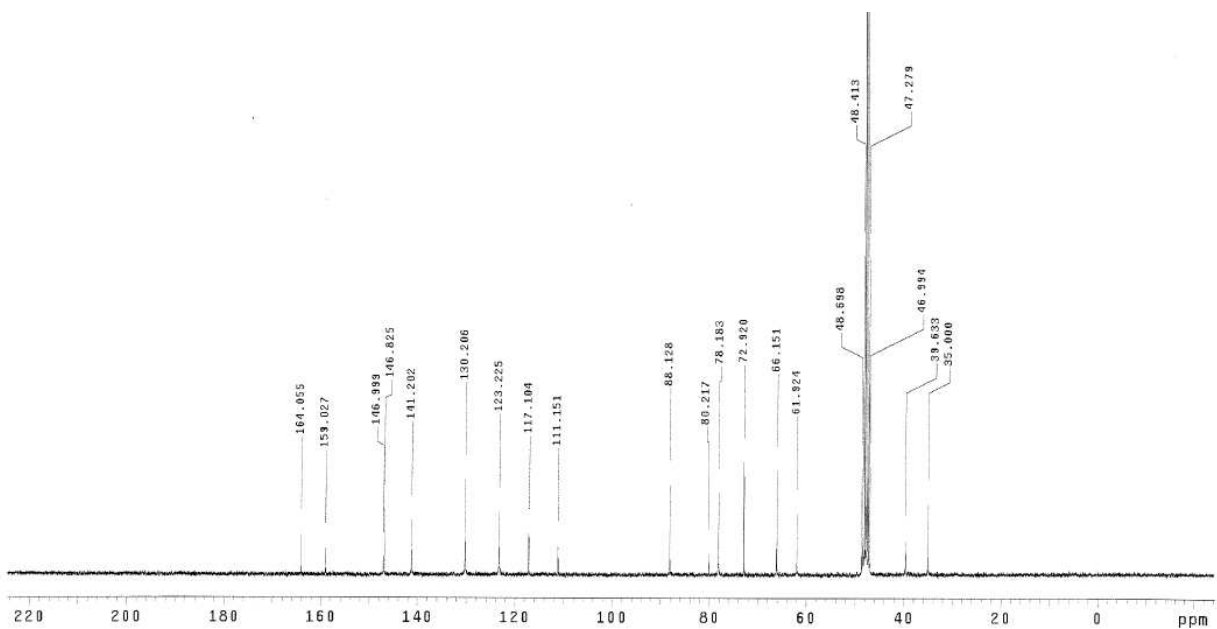

STANDARD 1H OBSERVE  
Pulse Sequence: e2pu1

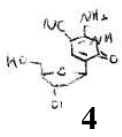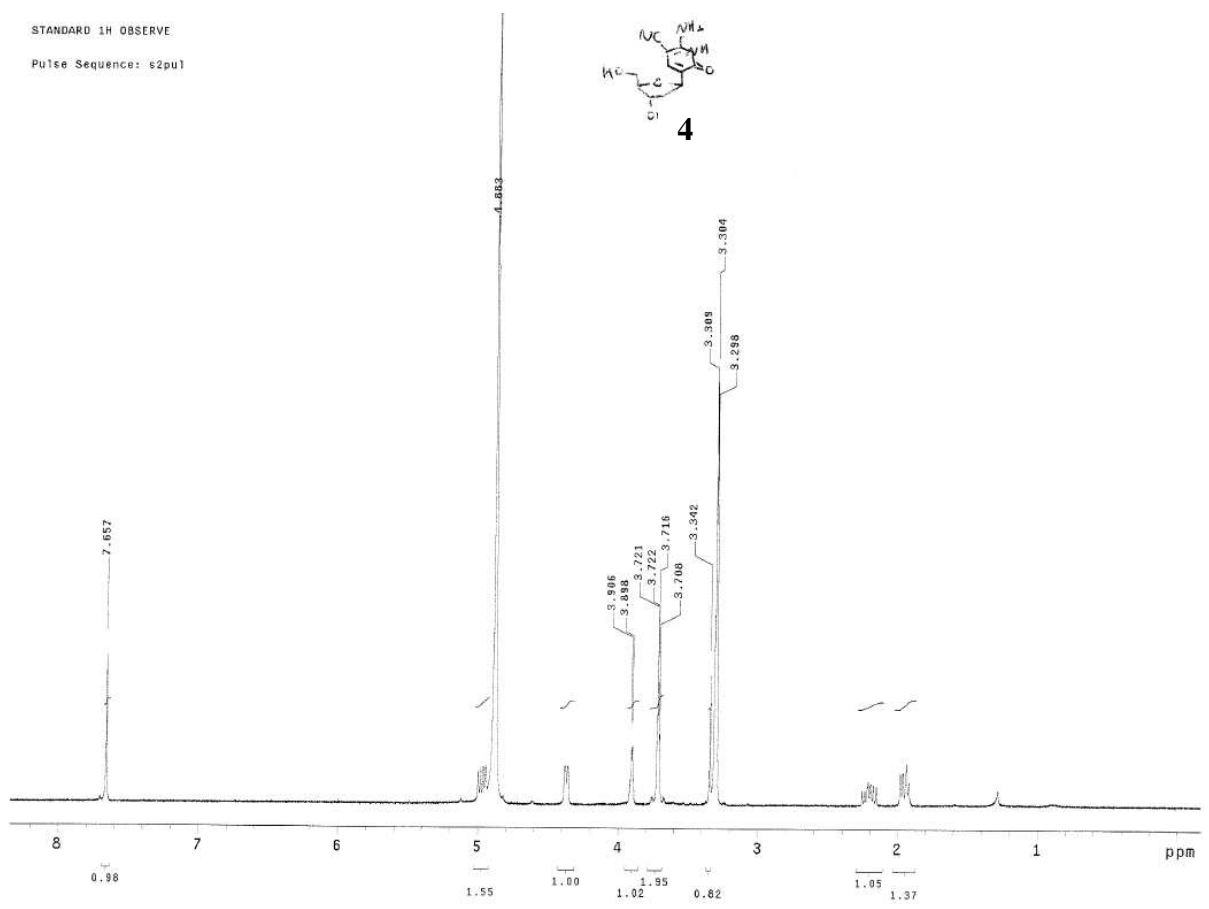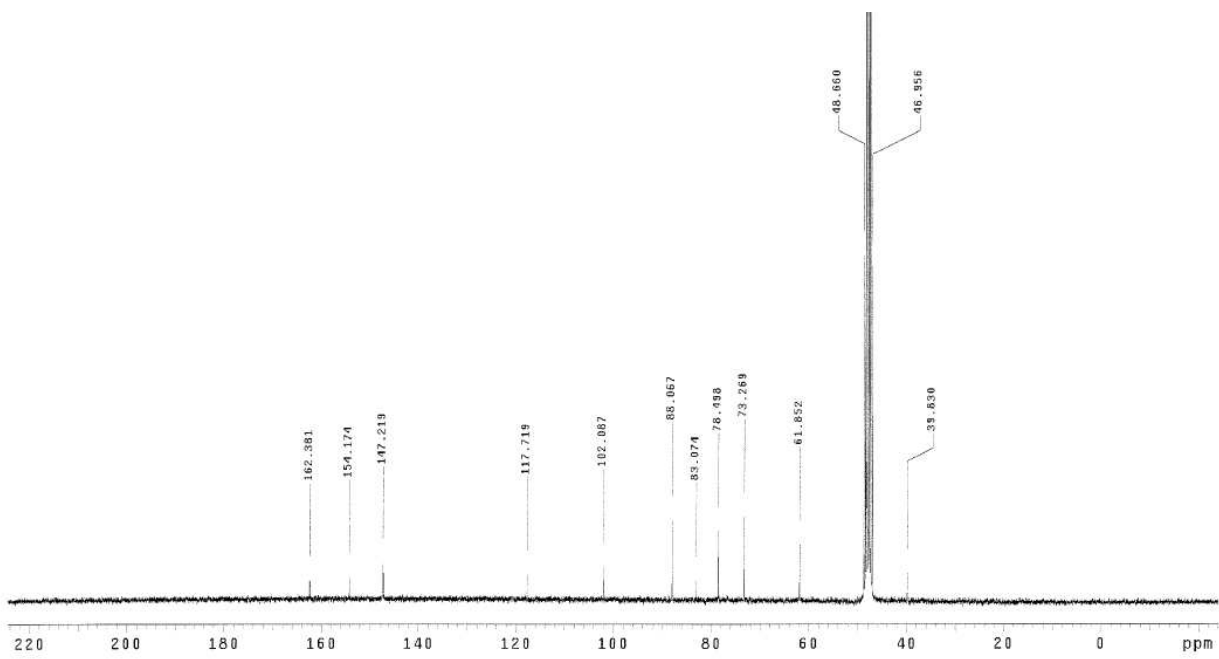

STANDARD 1H OBSERVE  
Pulse Sequence: s2pu1

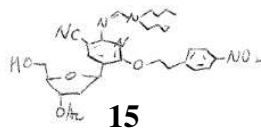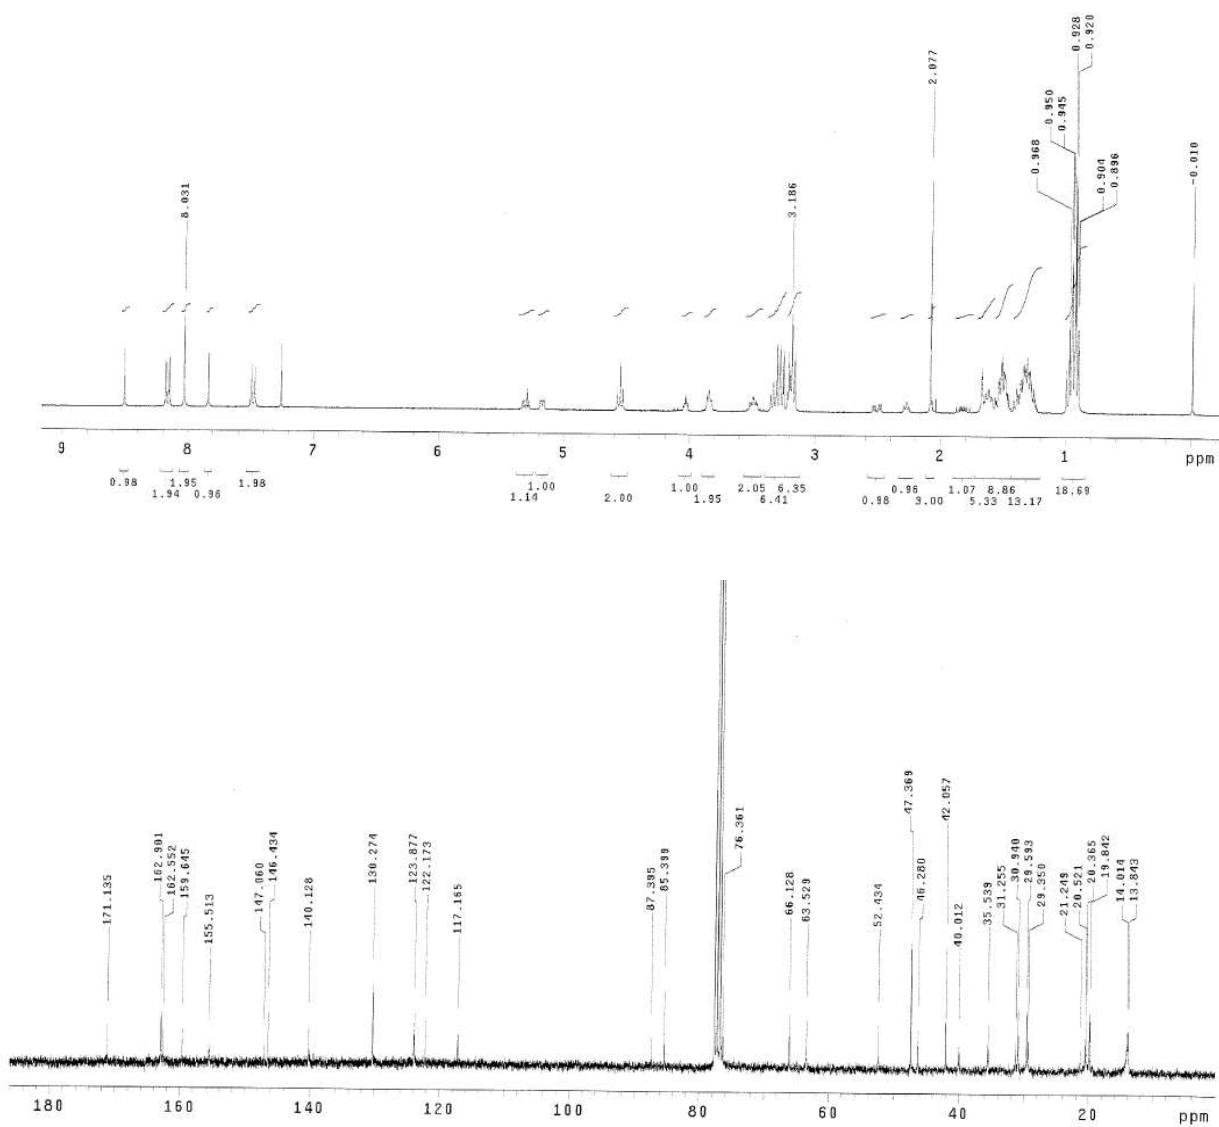

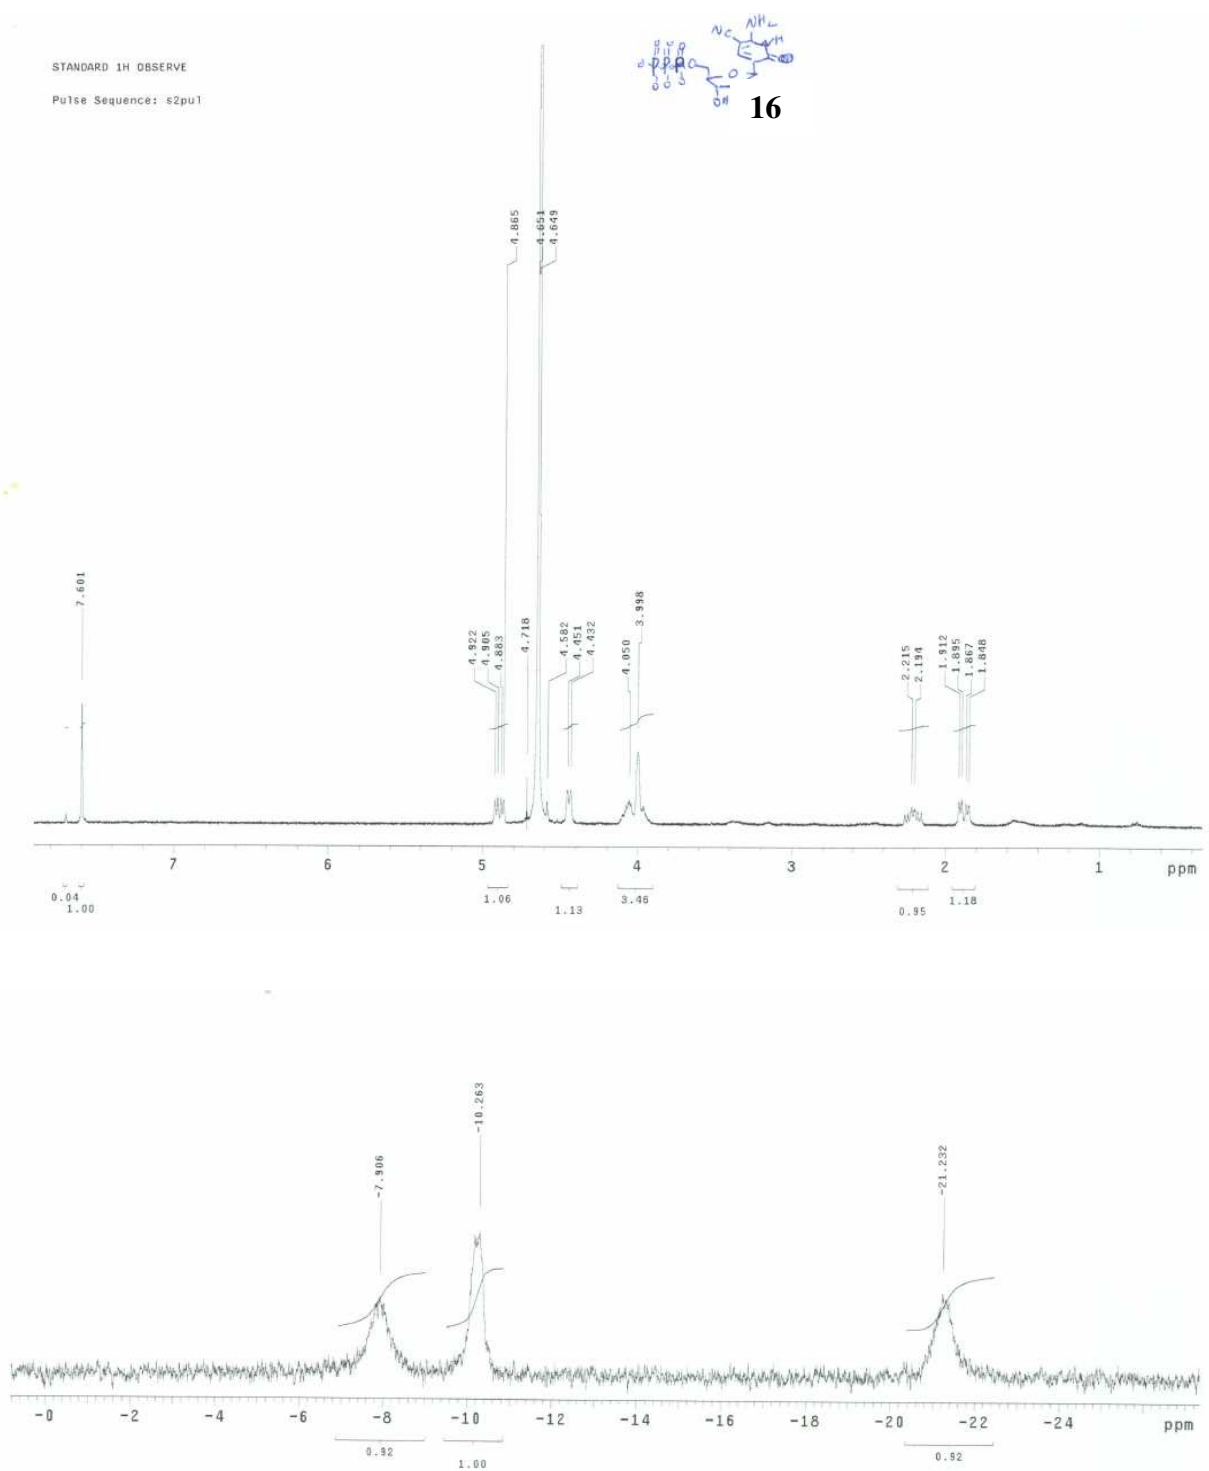

Supplement: Supplementary file 1 [file 4176457]
